# Supplementary material for: Achromobacter xylosoxidans and Enteromorpha intestinalis Extract Improve Tomato Growth under Salt Stress
Source: MDPI journal article supplement (doi:10.3390/agronomy12040934), 2022-04-13
Supplement: s1 [file s1]

**Table S1.** Soil physicochemical properties

---

|                                                   |            |
|---------------------------------------------------|------------|
| pH (H <sub>2</sub> O) (20.4 °C)                   | 7.3        |
| $\sigma$ ( mS/cm)                                 | 0.723      |
| Texture                                           | Sandy clay |
| Organic matter                                    | 1.94%      |
| % N                                               | 0.10       |
| Phosphorus (P <sub>2</sub> O <sub>5</sub> ) mg/kg | 128        |
| Potassium (K <sub>2</sub> O) mg/kg                | 146        |
| Sulfur (S) mg/kg                                  | 51.8       |
| Sodium (Na) mg/kg                                 | 52.3       |

---
