# Supplementary material for: Achromobacter xylosoxidans and Enteromorpha intestinalis Extract Improve Tomato Growth under Salt Stress
Source: MDPI journal article supplement (doi:10.3390/agronomy12040934), 2022-04-13
Supplement: s1 [file s1]

**Table S2.** Biolog substrates used by *Achromobacter xylosoxidans* BOA4

| Substrates                              | AUC (Area Under Curve) |
|-----------------------------------------|------------------------|
| <b>Carbohydrates</b>                    |                        |
| β-Methyl-D-Glucoside                    | 1.11                   |
| D-Xylose                                | 7.81                   |
| <b>Carboxylic acids and derivatives</b> |                        |
| D-Galactonic Acid γ-Lactone             | 77.81                  |
| Pyruvic Acid Methyl Ester               | 68.80                  |
| γ-Hydroxybutyric Acid                   | 11.15                  |
| Itaconic Acid                           | 25.27                  |
| α-Ketobutyric Acid                      | 5.73                   |
| D-Malic Acid                            | 49.67                  |
| <b>Amino acids and derivatives</b>      |                        |
| L-Asparagine                            | 57.12                  |
| L-Phenylalanine                         | 68.31                  |
| L-Serine                                | 56.84                  |
| L-Threonine                             | 2.87                   |
| Glycyl-L-Glutamic Acid                  | 76.44                  |
| <b>Polysorbates</b>                     |                        |
| Tween 40                                | 5.89                   |
| Tween 80                                | 12.43                  |
| <b>Polysaccharides</b>                  |                        |
| α-Cyclodextrin                          | 3.81                   |
| Glycogen                                | 9.24                   |
| <b>Phosphoric esters</b>                |                        |
| D,L-α-Glycerol Phosphate                | 6.93                   |
| <b>Amines</b>                           |                        |
| Phenylethyl-amine                       | 43.57                  |
